# Supplementary material
Source: PubMed Central journal article supplement (PMC4074289)
Supplement: supp_138.12.2451_DEV058362TableS1.pdf [file supp_138.12.2451_DEV058362TableS1.pdf]

**Table S1. Probe and primer sequences (5' to 3') used in RNA blots, qRT-PCR and cloning**

| microRNA    | Probe sequence                   |             |
|-------------|----------------------------------|-------------|
| miR172      | CTGCAGCATCATCAAGATTCT            |             |
| Primer      | To prepare northern probes       |             |
| AP2-F       | GACGCACCACACCAAACACA             |             |
| AP2-R       | ATCTTGGTCCACGCCGACTC             |             |
| 5.8S rRNA-F | GCGCAACTTGCGTTCAAAGA             |             |
| 5.8S rRNA-R | TTGTGACACCCAGGCAGACG             |             |
| Primer      | qRT-PCR of AP2                   | Annealing   |
| AP2-qRT-F   | CGAAGCTGCTAGAGCTTACG             | 57°C        |
| AP2-qRT-R   | CGAGGTTGTGATCTTGTGGAGTAG         |             |
| GAPC-qRT-F  | CCAGTCACTGTTTTCGGCATCA           | 60°C        |
| GAPC-qRT-R  | AGCTGCAGCCTTGTCTTTGTCA           |             |
| Primer      | Cloning for BIFC                 | Sites added |
| AP2-cDNA-F  | ATGTCGACATGTGGGATCTAAACGACGCA    | <i>SalI</i> |
| AP2 cDNA-R  | CCCGGGTCCAGAAGGTTCATGAGAGGAG     | <i>XmaI</i> |
| SEU-cDNA-F  | ATGTCGACATGGTACCATCAGAGCCGCCTAAT | <i>SalI</i> |
| SEU-cDNA-R  | CCCGGGTCCCGCGTTCCAATCAAAATT      | <i>XmaI</i> |
| LUH-cDNA-F  | ATGTCGACATGGCTCAGAGTAATTGGGAA    | <i>SalI</i> |
| LUH-cDNA-R  | CCCGGGCTTCCAAATCTTTACGGATTGT     | <i>XmaI</i> |
