# Supplementary material
Source: PubMed Central journal article supplement (PMC4074289)
Supplement: supp_138.12.2451_DEV058362TableS2.pdf [file supp_138.12.2451_DEV058362TableS2.pdf]

**Table S2. Percentage of sepals that ectopically express miR172**

| Genotype          | Percentage sepals (stages 6-11) that showed miR172 expression* | Total number of sepals at stages 6-11* |
|-------------------|----------------------------------------------------------------|----------------------------------------|
| WT ( <i>Ler</i> ) | 8 <sup>†</sup>                                                 | 37                                     |
| <i>lug-3</i>      | 82                                                             | 17                                     |
| <i>seu-1</i>      | 82                                                             | 22                                     |
| <i>ap2-2</i>      | 100                                                            | 20                                     |

\*Summary of results from three independent in situ experiments. Each experiment examined three to five inflorescences of each genotype. In most cases, two sepals per flower (at stages 6-11) were scored. Flowers older than stage 11 had been removed before sample fixation.

<sup>†</sup>Three of the 37 wild-type sepals appeared to show some miR172 signals, which might represent background signals.
