# Supplementary material
Source: PubMed Central journal article supplement (PMC4074289)
Supplement: supp_138.12.2451_DEV058362TableS3.pdf [file supp_138.12.2451_DEV058362TableS3.pdf]

**Table S3. Semi-quantitative PCR primers and summary of CHIP results**

| Gene              | PCR primer (5' to 3')    | AP2 binding site* | Enrichment (LUG-GFP) ( <i>lug-16</i> ) | Enrichment (SEU-GFP) ( <i>WT</i> ) |
|-------------------|--------------------------|-------------------|----------------------------------------|------------------------------------|
| <i>miR172c-F1</i> | GAGATTACGAGAATCCGCACTCA  | 1.6 kb            | No                                     | No                                 |
| <i>miR172c-R1</i> | GGTTTTAGGCTTTTAGCCCAAGGA |                   |                                        |                                    |
| <i>miR172c-F2</i> | AGGATCCACATGTGCCATA      | 1.4 kb            | Yes                                    | Yes                                |
| <i>miR172c-R2</i> | CGTGAGCTATTCAGGATCACGA   |                   |                                        |                                    |
| <i>miR172c-F3</i> | TCGCTGACTAAATAGTTGGA     | 366 bp            | No                                     | No                                 |
| <i>miR172c-R3</i> | GAGGCCAATTTTGCATCC       |                   |                                        |                                    |
| <i>miR172c-F4</i> | ACCTGAGTATCTGAGATCTCAGT  | 225 bp            | No                                     | No                                 |
| <i>miR172c-R4</i> | AGGGATGTATGTAGTGATTGG    |                   |                                        |                                    |
| <i>miR172e-F</i>  | AGCCTTTGGCTTCTGTTCTGA    | 118 bp            | Yes                                    | Yes                                |
| <i>miR172e-R</i>  | CGGTTTCGAGGTCTAAAGTTGGGA |                   |                                        |                                    |
| <i>EIF4a1-F</i>   | CGCATCCTATCGGATTGTCT     | NA                | No                                     | No                                 |
| <i>EIF4a1-R</i>   | CTCAGATGATGTGCGGAGAA.    |                   |                                        |                                    |

\*Approximate location of each AP2 binding site from the start of cDNA (*miR172*) based on sequence information from [www.arabidopsis.org](http://www.arabidopsis.org). NA, not available.
