# Supplementary material
Source: PubMed Central journal article supplement (PMC4074289)
Supplement: supp_138.12.2451_DEV058362TableS4.pdf [file supp_138.12.2451_DEV058362TableS4.pdf]

**Table S4. qPCR primer sequences and summary of ChIP results**

| Gene              | qPCR primer (5' to 3')   | AP2 binding site* | Enrichment<br>(LUG-GFP) ( <i>lug-16</i> ) | Enrichment<br>(SEU-GFP) ( <i>WT</i> ) | Slope  | Primer<br>percentage<br>efficiency |
|-------------------|--------------------------|-------------------|-------------------------------------------|---------------------------------------|--------|------------------------------------|
| <i>miR172c-F1</i> | GAGATTACGAGAATCCGCACTCA  | 1.6 kb            | No                                        | No                                    | -3.246 | 103.2                              |
| <i>miR172c-R1</i> | GGTTTTAGGCTTTTAGCCCAAGGA |                   |                                           |                                       |        |                                    |
| <i>miR172c-F2</i> | CCACATGTGCCCATATTGAT     | 1.4 kb            | Yes                                       | Yes                                   | -3.518 | 92.3                               |
| <i>miR172c-R2</i> | GAAGATCCACTTTTAAAGCCCAAT |                   |                                           |                                       |        |                                    |
| <i>miR172e-F</i>  | GCTGTCTGAATCCTTGTTCCTC   | 118 bp            | Yes                                       | Yes                                   | -3.155 | 107.4                              |
| <i>miR172e-R</i>  | CGGTTTCGAGGTCTAAAGTTGTGA |                   |                                           |                                       |        |                                    |

\*Approximate location of each AP2 binding site from the start of cDNA (*miR172*) based on sequence information from [www.arabidopsis.org](http://www.arabidopsis.org).
